# Supplementary material for: Amplified spontaneous emission from waveguides based on hybrid quasi-2D perovskites of Dion–Jacobson and Ruddlesden–Popper phases
Source: Royal Society of Chemistry journal article supplement (doi:10.1039/d3tc01425h), 2023-01-01
Supplement: d3tc01425h1.pdf [file d3tc01425h1.pdf]

## Supporting Information

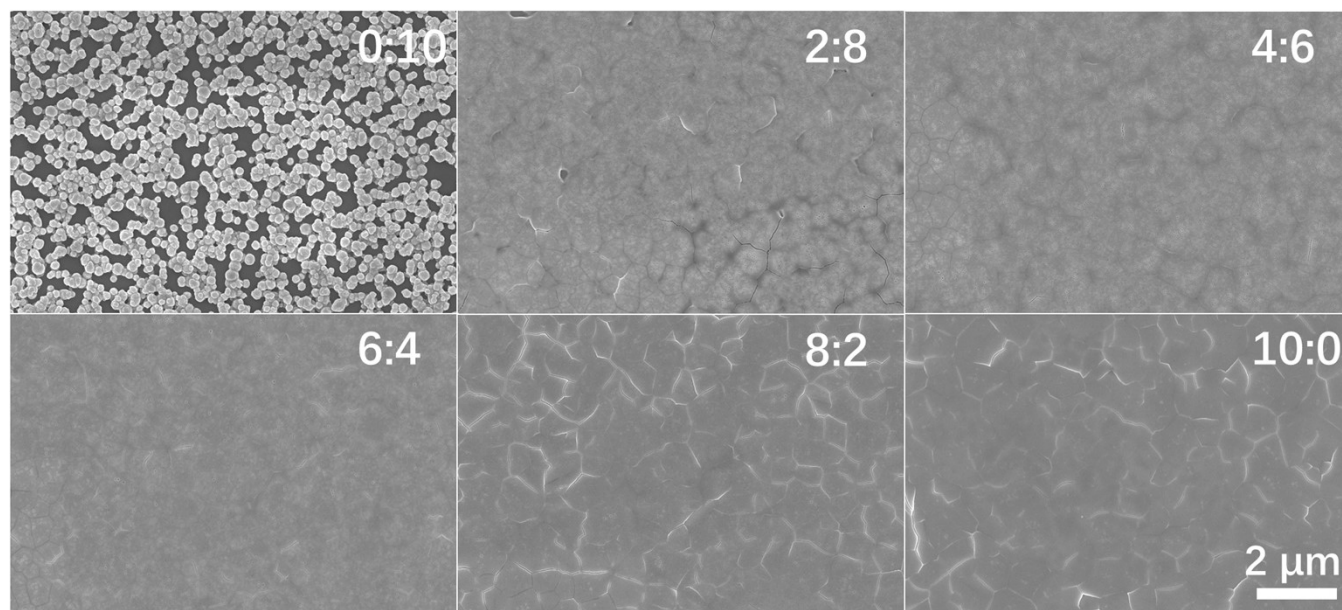

Figure S1. SEM images of RP/DJ mixed perovskite films with different ratios. All images use the same scale bar.

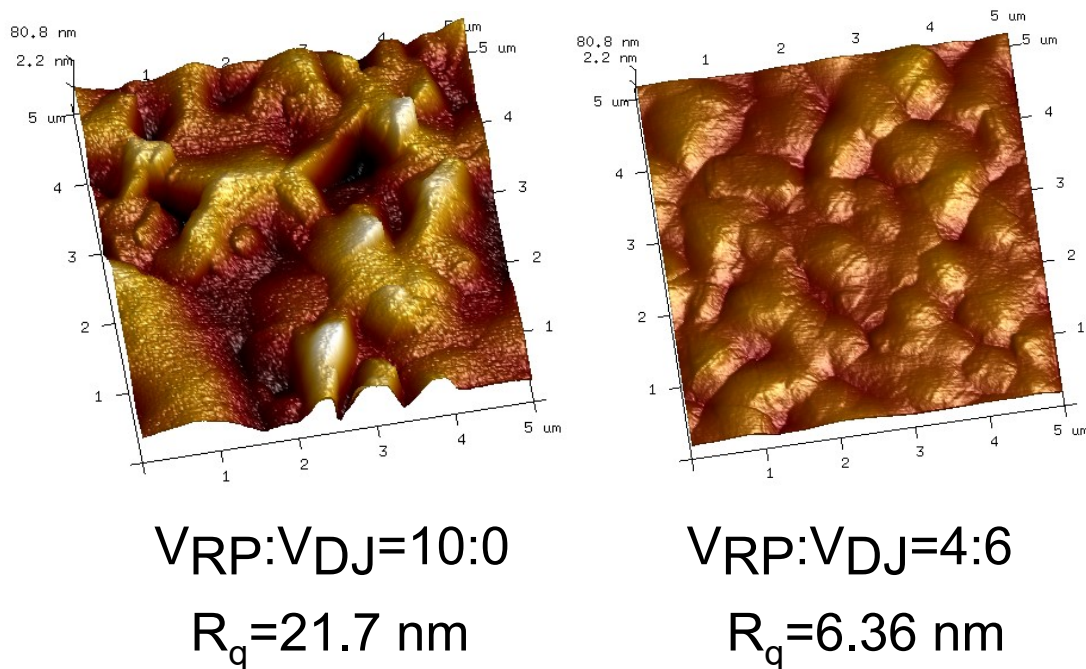

Figure S2. AFM 3D image of RP and RP/DJ films.

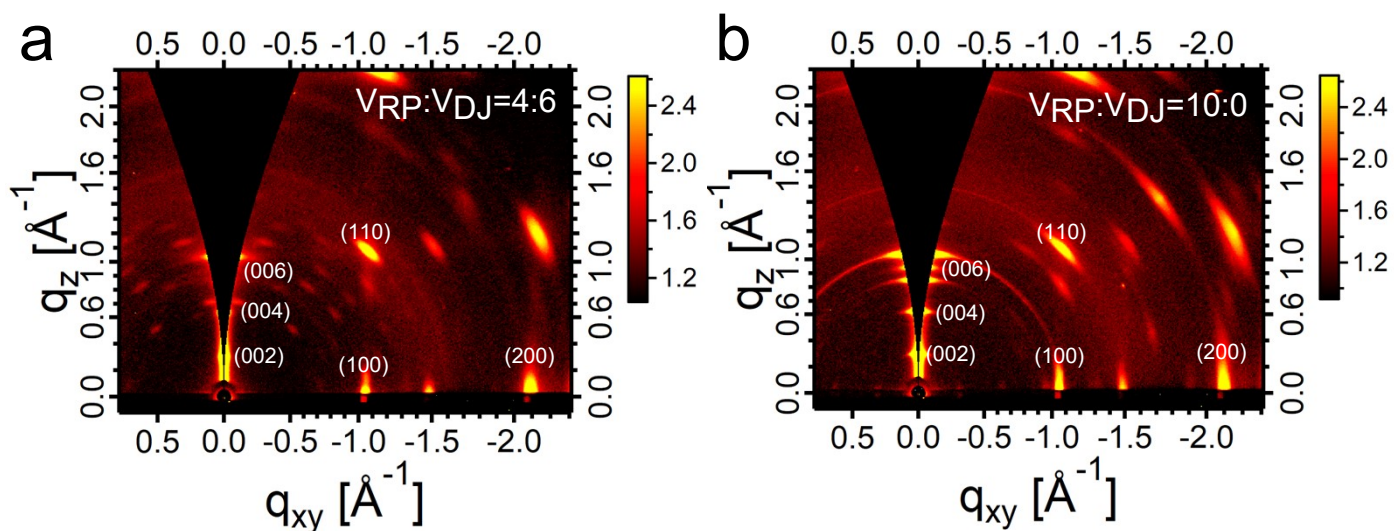

Figure S3. GIWAXS of RP/DJ hybrid film (a) and RP film (b).

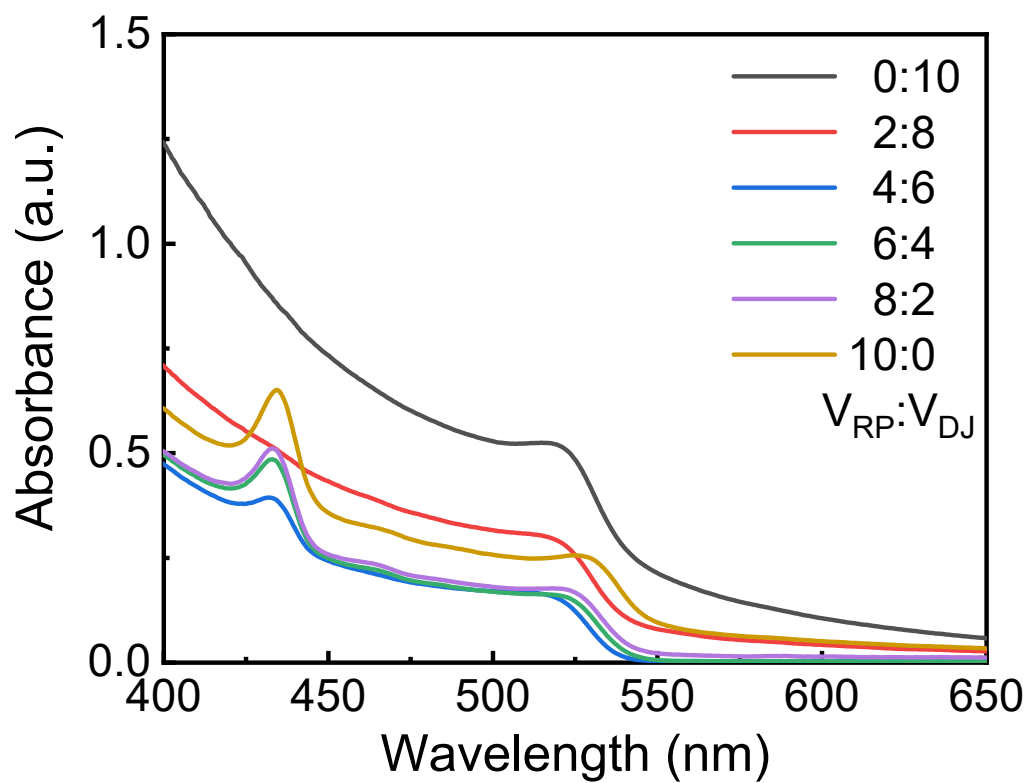

Figure S4. Abs. spectra of RP/DJ mixed perovskite films with different RP:DJ ratios.

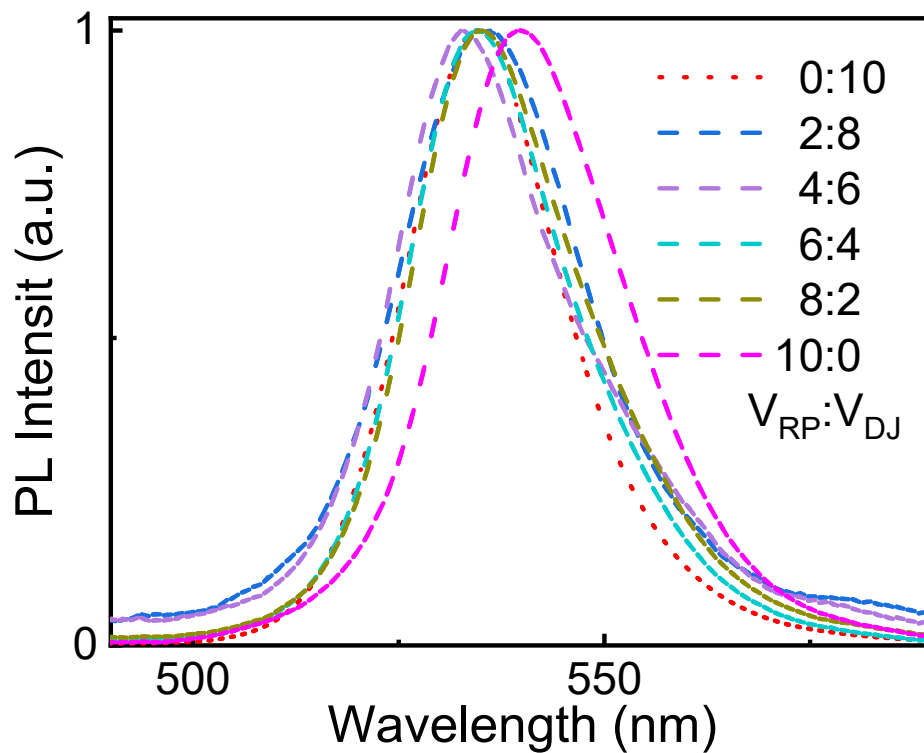

Figure S5. PL spectra of RP/DJ mixed perovskite films with different ratios.

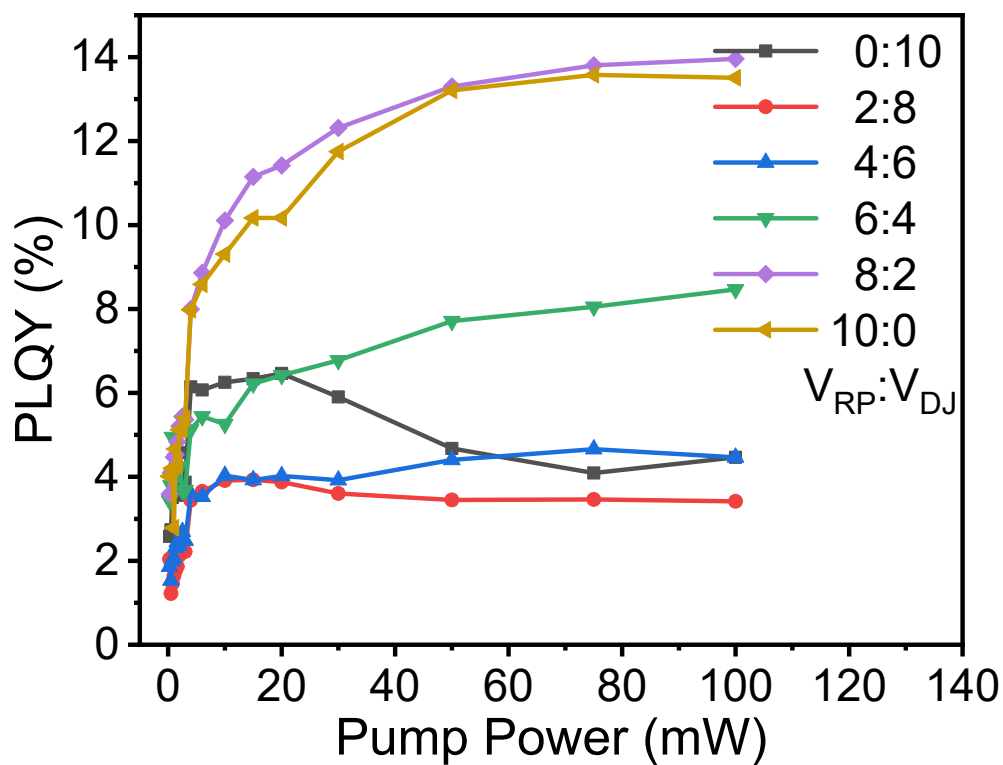

Figure S6. PLQY of RP/DJ mixed perovskite films with different ratios.

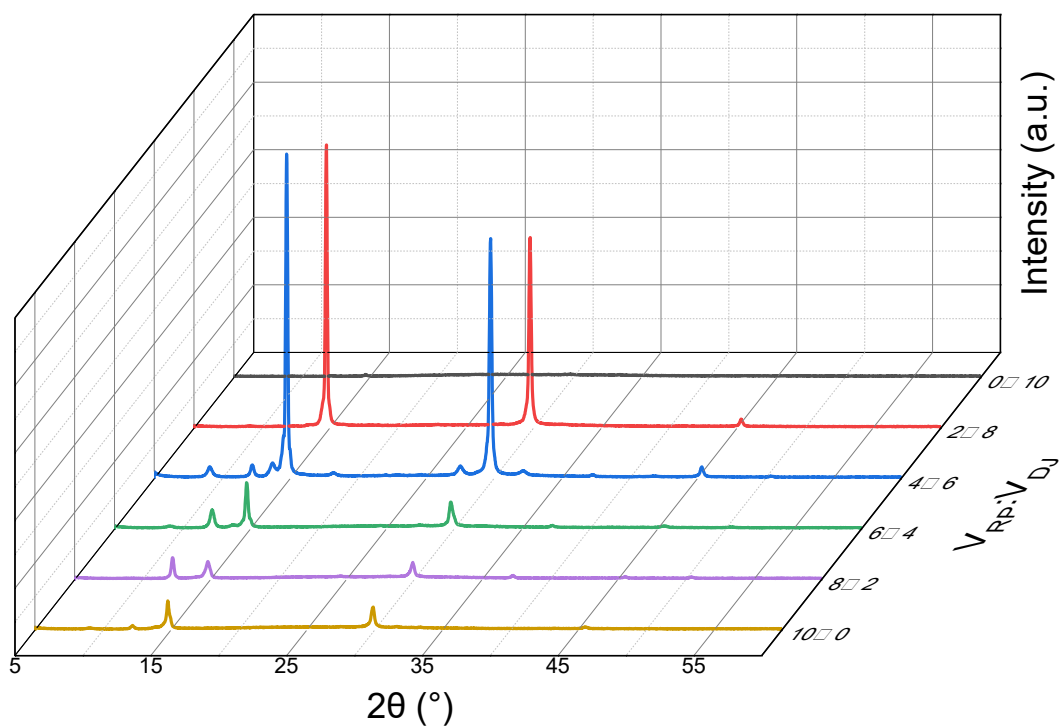

Figure S7. XRD patterns of RP/DJ mixed perovskite films with different ratios.

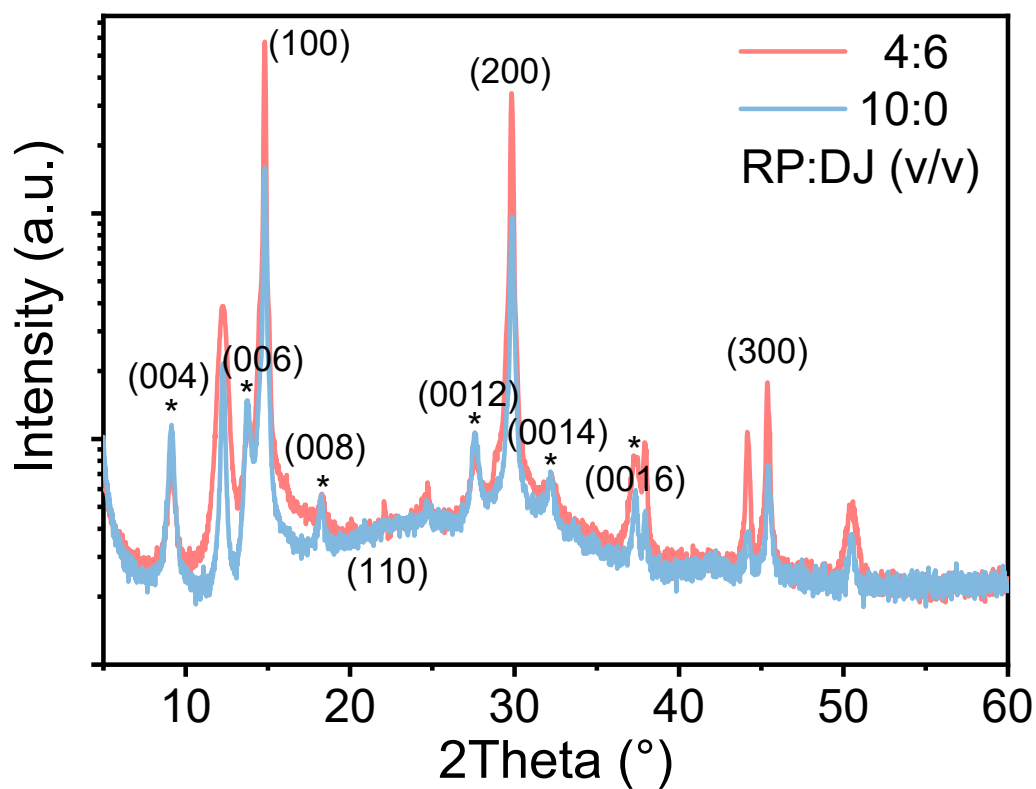

Figure S8. XRD patterns on log-scale. star: 2D phase with  $n=2$ .

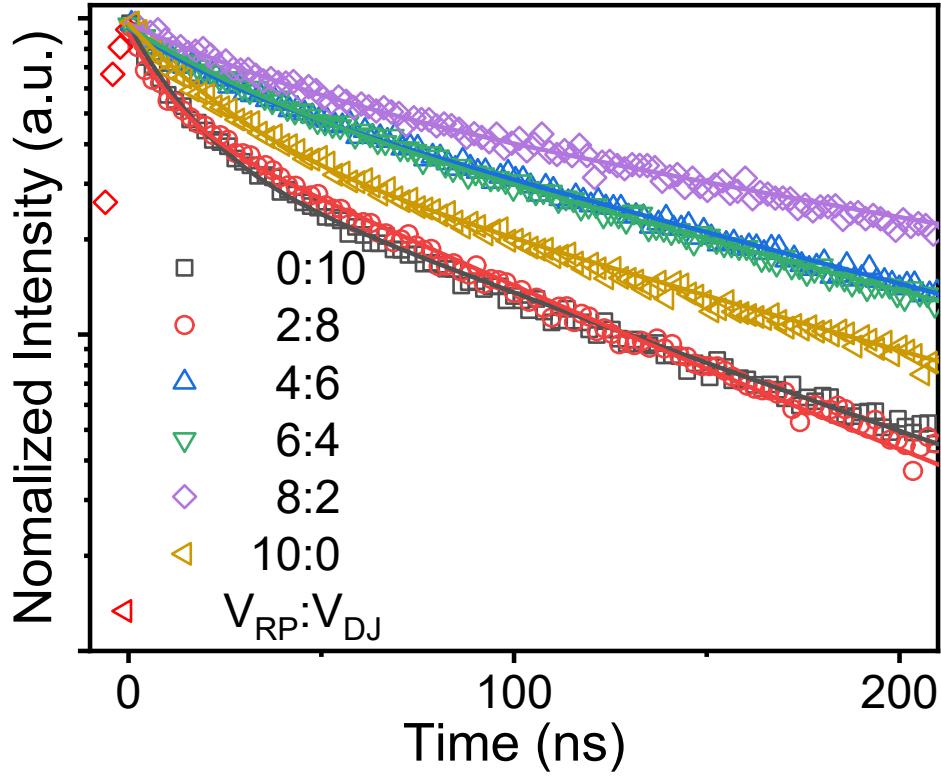

Figure S9. TRPL pattern of RP/DJ mixed perovskite films with different ratios.

Table S1. The fitting data of TRPL of RP/DJ mixed perovskite films with different ratios.

|      | $a_1$ | $\tau_1$ (ns) | $a_2$ | $\tau_2$ (ns) | $\tau_{avg}$ (ns) |
|------|-------|---------------|-------|---------------|-------------------|
| 0:10 | 0.56  | 13.16         | 0.38  | 93.56         | 45.66             |
| 2:8  | 0.40  | 9.59          | 0.49  | 78.54         | 47.79             |
| 4:6  | 0.28  | 22.13         | 0.65  | 131.22        | 98.45             |
| 6:4  | 0.33  | 28.63         | 0.61  | 132.84        | 96.19             |
| 8:2  | 0.36  | 38.31         | 0.61  | 219.78        | 152.09            |
| 10:0 | 0.51  | 20.60         | 0.44  | 120.09        | 66.85             |

The curves are fitted by a bi-exponential decay function:

$$f(t) = y_0 + a_1 e^{-t/\tau_1} + a_2 e^{-t/\tau_2}$$

where  $\tau_1$  and  $\tau_2$  correspond to the time of the fast and slow decay components, and  $a_1$  and  $a_2$  correspond to the weights of the fast and slow decay components, respectively.

Table S2. The summary of threshold and gain coefficient of RP/DJ mixed perovskite films

| RP/DJ                                  | 0:10 | 2:8  | 4:6  | 6:4 | 8:2 | 10:0 |
|----------------------------------------|------|------|------|-----|-----|------|
| $P_{th}$ ( $\mu\text{W}/\text{cm}^2$ ) | none | none | 30.1 | 47  | 35  | 52.2 |
| $g$ ( $\text{cm}^{-1}$ )               | none | none | 785  | 335 | 523 | 379  |

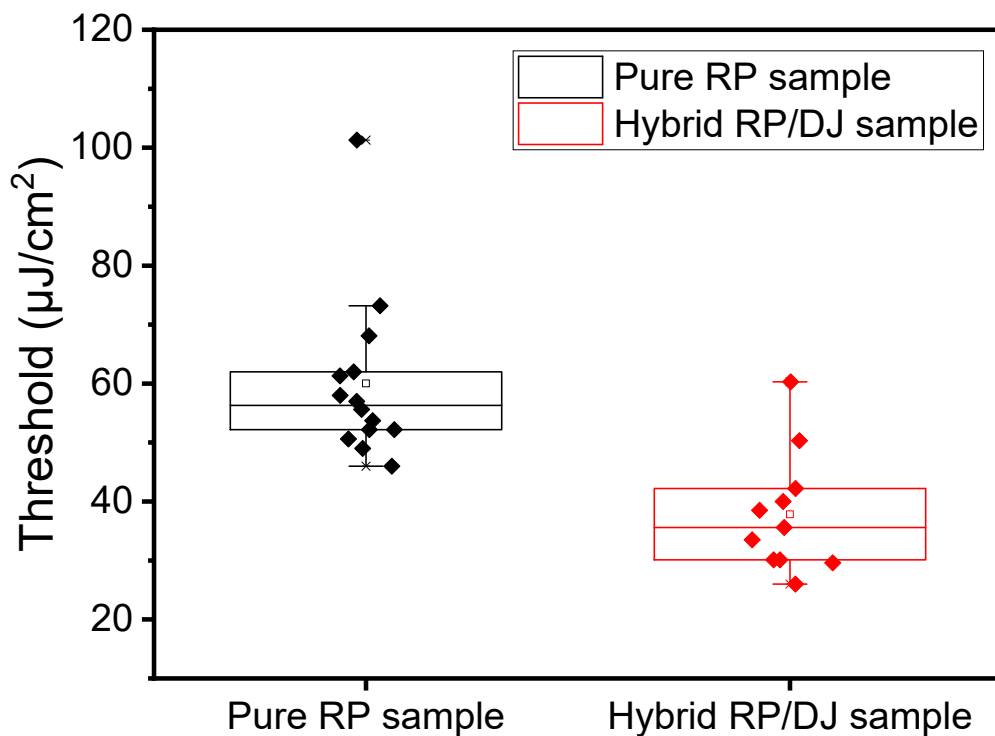

Figure S10. Statistical data of the threshold of RP and RP/DJ hybrid films

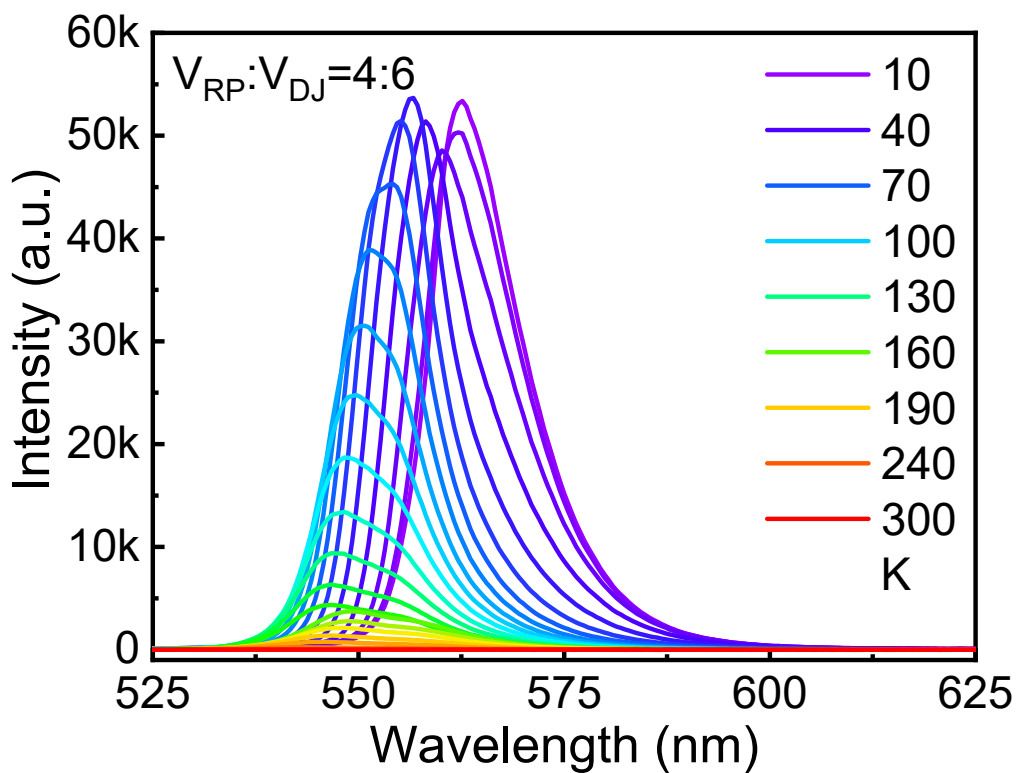

Figure S11. PL spectra of RP/DJ mixed perovskite films with ratio of 4:6 at different temperatures.

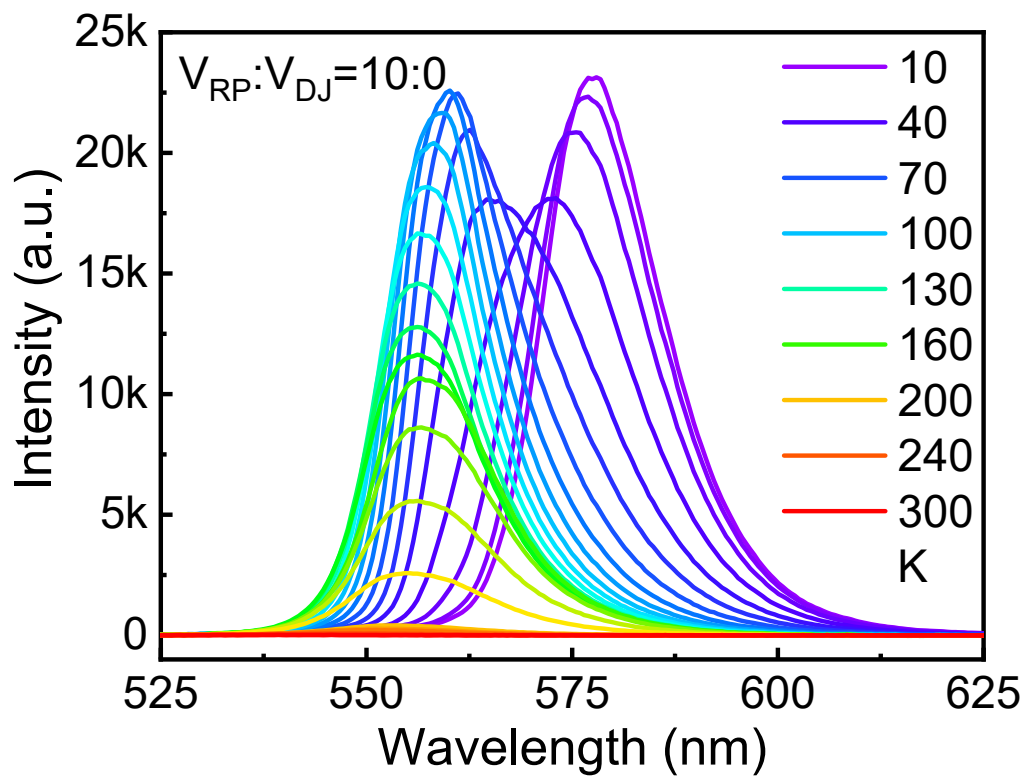

Figure S12. PL spectra of RP/DJ mixed perovskite films with ratio of 10:0 at different temperatures.
